# Supplementary material for: Prevalence of orthostatic intolerance in Long Covid clinic patients: A multicentre observational study
Source: bioRxiv or medRxiv preprint supplement (doi:10.1101/2023.12.18.23299958), 2023-12-18
Supplement: Supplementary file [file media-2.pdf]

Supplemental material

Table 1. Acute test symptoms of dysautonomia on standing, presenting in Long COVID patients who could not complete the lean test because of excessive symptoms.

| Symptom                                     | In Long COVID patients who could not complete lean test<br>(n=46) |
|---------------------------------------------|-------------------------------------------------------------------|
| <i>Symptoms of orthostatic intolerance:</i> |                                                                   |
| Dizziness / light-headedness                | 23 (50%)                                                          |
| Palpitations                                | 5 (11%)                                                           |
| Chest pain / discomfort                     | 2 (4%)                                                            |
| Tremors                                     | 1 (2%)                                                            |
| <i>Other symptoms of dysautonomia:</i>      |                                                                   |
| Tingling / numbness in skin                 | 11 (24%)                                                          |
| Fatigue                                     | 11 (24%)                                                          |
| Sweating / clammy / hot                     | 5 (11%)                                                           |
| Breathlessness                              | 2 (4%)                                                            |
| Headache                                    | 4 (9%)                                                            |
| Muscle / joint pain                         | 2 (4%)                                                            |
| Cognitive dysfunction                       | 1 (2%)                                                            |
| Visual disturbances                         | 1 (2%)                                                            |

Supplemental Table 2. Associations between patient characteristics, pre-existing comorbidities and prior symptoms with criteria for POTS, both unadjusted and adjusted for age and sex, in Long COVID patients.

|                                                     | POTS<br>(n=20) | No POTS<br>(n=257) | Unadjusted OR<br>(95% CI) | Adjusted OR*<br>(95% CI) |
|-----------------------------------------------------|----------------|--------------------|---------------------------|--------------------------|
| Patient characteristics (%):                        |                |                    |                           |                          |
| Age ≥50 years                                       | 5 (25%)        | 139 (54%)          | 0.3 (0.1, 0.8)            | 0.3 (0.1, 0.8)           |
| Female gender                                       | 6 (30%)        | 98 (38%)           | 1.4 (0.5, 3.9)            | 1.3 (0.5, 3.6)           |
| Body mass index ≥30 kg/m <sup>2</sup>               | 4 (27%)        | 79 (41%)           | 0.5 (0.2, 1.7)            | 0.7 (0.2, 2.2)           |
| Non-white ethnicity                                 | 2 (10%)        | 44 (18%)           | 0.5 (0.1, 2.3)            | 0.4 (0.1, 1.6)           |
| Long COVID duration ≥12 months                      | 18 (90%)       | 226 (88%)          | 1.2 (0.3, 5.6)            | 1.0 (0.2, 4.7)           |
| Pre-existing comorbidities (%):                     |                |                    |                           |                          |
| Allergies or autoimmune conditions                  | 4 (20%)        | 40 (15%)           | 1.4 (0.4, 4.3)            | 1.6 (0.5, 5.2)           |
| Other inflammatory conditions                       | 1 (5%)         | 11 (4%)            | 1.2 (0.1, 9.6)            | 3.0 (0.3, 27.8)          |
| Hypertension                                        | 2 (10%)        | 26 (10%)           | 1.0 (0.2, 4.5)            | 1.4 (0.3, 7.1)           |
| Other heart conditions                              | 2 (10%)        | 20 (8%)            | 1.3 (0.3, 6.1)            | 1.5 (0.3, 7.0)           |
| Type 2 diabetes mellitus                            | 0 (0%)         | 16 (6%)            | -                         | -                        |
| Mental health condition                             | 6 (30%)        | 37 (14%)           | 2.5 (0.9, 7.1)            | 2.2 (0.8, 6.3)           |
| History suggestive of orthostatic intolerance (%):  |                |                    |                           |                          |
| Dizziness or light headedness                       | 14 (70%)       | 91 (35%)           | 4.3 (1.6, 11.5)           | 3.9 (1.4, 10.8)          |
| Palpitations                                        | 7 (35%)        | 63 (25%)           | 1.7 (0.6, 4.3)            | 1.4 (0.5, 3.7)           |
| Chest pain or discomfort                            | 3 (15%)        | 24 (9%)            | 1.7 (0.5, 6.3)            | 1.2 (0.3, 4.7)           |
| Tremors                                             | 2 (10%)        | 9 (4%)             | 3.1 (0.6, 15.2)           | 4.2 (0.8, 22.9)          |
| Any of dizziness, palpitations, chest pain, tremors | 14 (70%)       | 116 (45%)          | 2.8 (1.1, 7.6)            | 2.3 (0.8, 6.3)           |
| Other prior symptoms (%):                           |                |                    |                           |                          |
| Fatigue                                             | 3 (15%)        | 27 (11%)           | 1.5 (0.4, 5.5)            | 1.5 (0.4, 5.7)           |
| Aches or pains                                      | 2 (10%)        | 22 (9%)            | 1.2 (0.3, 5.5)            | 1.0 (0.2, 5.0)           |
| Breathlessness                                      | 2 (10%)        | 14 (5%)            | 1.9 (0.4, 9.2)            | 2.3 (0.5, 11.2)          |

\* Odds ratios adjusted for age and sex. Age and sex only adjusted for each other.

Supplemental Table 3. Associations between patient characteristics, pre-existing comorbidities, and prior symptoms with criteria for orthostatic hypotension, both unadjusted and adjusted for age and sex, in Long COVID patients.

|                                                     | Orthostatic hypotension (n=21) | No Orthostatic hypotension (n=256) | Unadjusted OR (95% CI) | Adjusted OR* (95% CI) |
|-----------------------------------------------------|--------------------------------|------------------------------------|------------------------|-----------------------|
| Patient characteristics (%):                        |                                |                                    |                        |                       |
| Age ≥50 years                                       | 19 (90%)                       | 125 (49%)                          | 10.0 (2.3, 43.6)       | 10.5 (2.4, 46.3)      |
| Female gender                                       | 8 (38%)                        | 96 (38%)                           | 1.0 (0.4, 2.4)         | 1.4 (0.5, 3.6)        |
| Body mass index ≥30 kg/m <sup>2</sup>               | 5 (31%)                        | 78 (41%)                           | 0.7 (0.2, 2.0)         | 0.4 (0.1, 1.4)        |
| Non-white ethnicity                                 | 2 (10%)                        | 44 (18%)                           | 0.5 (0.1, 2.3)         | 0.8 (0.2, 3.9)        |
| Long COVID duration ≥12 months                      | 19 (90%)                       | 225 (88%)                          | 1.3 (0.3, 5.9)         | 1.7 (0.4, 8.1)        |
| Pre-existing comorbidities (%):                     |                                |                                    |                        |                       |
| Allergies or autoimmune conditions                  | 3 (14%)                        | 41 (16%)                           | 0.9 (0.2, 3.1)         | 1.0 (0.3, 3.6)        |
| Other inflammatory conditions                       | 1 (5%)                         | 11 (4%)                            | 1.1 (0.1, 9.1)         | 0.7 (0.1, 6.1)        |
| Hypertension                                        | 4 (19%)                        | 24 (9%)                            | 2.3 (0.7, 7.3)         | 1.9 (0.6, 6.4)        |
| Other heart conditions                              | 1 (5%)                         | 21 (8%)                            | 0.6 (0.1, 4.4)         | 0.6 (0.1, 4.8)        |
| Type 2 diabetes mellitus                            | 4 (19%)                        | 12 (5%)                            | 4.8 (1.4, 16.4)        | 2.6 (0.7, 9.5)        |
| Mental health condition                             | 2 (10%)                        | 41 (16%)                           | 0.6 (0.1, 2.5)         | 0.7 (0.1, 3.2)        |
| History suggestive of orthostatic intolerance (%):  |                                |                                    |                        |                       |
| Dizziness or light headedness                       | 7 (33%)                        | 98 (38%)                           | 0.8 (0.3, 2.1)         | 1.1 (0.4, 3.1)        |
| Palpitations                                        | 5 (24%)                        | 65 (25%)                           | 0.9 (0.3, 2.6)         | 1.3 (0.4, 4.0)        |
| Chest pain or discomfort                            | 0 (0%)                         | 27 (11%)                           | -                      | -                     |
| Tremors                                             | 0 (0%)                         | 11 (4%)                            | -                      | -                     |
| Any of dizziness, palpitations, chest pain, tremors | 7 (33%)                        | 123 (48%)                          | 0.5 (0.2, 1.4)         | 0.8 (0.3, 2.2)        |
| Other prior symptoms (%):                           |                                |                                    |                        |                       |
| Fatigue                                             | 6 (29%)                        | 24 (9%)                            | 3.9 (1.4, 10.9)        | 4.3 (1.4, 13.2)       |
| Aches or pains                                      | 1 (5%)                         | 23 (9%)                            | 0.5 (0.1, 3.9)         | 0.6 (0.1, 5.1)        |
| Breathlessness                                      | 1 (5%)                         | 15 (6%)                            | 0.8 (0.1, 6.4)         | 1.2 (0.1, 10.1)       |

\* Odds ratios adjusted for age and sex. Age and sex only adjusted for each other.

Supplemental Table 4. – Numbers and percentages of participants presenting during the lean test with sustained increased heart rate, orthostatic hypotension, or narrow pulse pressure, with and without acute symptoms during the lean test.

| Lean test measures                                      | Long COVID patients<br>(n=277)                                            |           |                |           | Healthy controls<br>(n=64)                                                |           |              |          |
|---------------------------------------------------------|---------------------------------------------------------------------------|-----------|----------------|-----------|---------------------------------------------------------------------------|-----------|--------------|----------|
|                                                         | History of Long COVID symptoms suggestive of<br>orthostatic intolerance § |           |                |           | History of Long COVID symptoms suggestive of<br>orthostatic intolerance § |           |              |          |
|                                                         | No<br>(n=147)                                                             |           | Yes<br>(n=130) |           | No<br>(n=50)                                                              |           | Yes<br>(n=0) |          |
|                                                         | n (%)                                                                     | (95% CI)  | n (%)          | (95% CI)  | n (%)                                                                     | (95% CI)  | n (%)        | (95% CI) |
| <b>Orthostatic tachycardia</b>                          |                                                                           |           |                |           |                                                                           |           |              |          |
| (Increased heart rate* with no drop in blood pressure†) |                                                                           |           |                |           |                                                                           |           |              |          |
| <i>With no acute symptoms during lean test</i>          | 5 (3%)                                                                    | (1, 8%)   | 3 (2%)         | (0, 7%)   | 0 (0%)                                                                    | (0, 7%)   | -            | -        |
| <i>With acute symptoms during lean test (POTS)‡</i>     | 6 (4%)                                                                    | (2, 9%)   | 14 (11%)       | (6, 17%)  | 0 (0%)                                                                    | (0, 7%)   | -            | -        |
| <b>Orthostatic hypotension</b>                          |                                                                           |           |                |           |                                                                           |           |              |          |
| (Fall in blood pressure†)                               |                                                                           |           |                |           |                                                                           |           |              |          |
| <i>With no acute symptoms during lean test</i>          | 6 (4%)                                                                    | (2, 9%)   | 4 (3%)         | (0, 8%)   | 5 (10%)                                                                   | (3, 22%)  | -            | -        |
| <i>With acute symptoms during lean test‡</i>            | 8 (5%)                                                                    | (2, 10%)  | 3 (2%)         | (0, 7%)   | 0 (0%)                                                                    | (0, 7%)   | -            | -        |
| <b>Narrow pulse pressure</b>                            |                                                                           |           |                |           |                                                                           |           |              |          |
| (Pulse pressure <25% of systolic blood pressure)        |                                                                           |           |                |           |                                                                           |           |              |          |
| <i>With no acute symptoms during lean test</i>          | 27 (18%)                                                                  | (12, 26%) | 24 (18%)       | (12, 26%) | 10 (20%)                                                                  | (10, 34%) | -            | -        |
| <i>With acute symptoms during lean test‡</i>            | 31 (21%)                                                                  | (15, 29%) | 40 (31%)       | (23, 39%) | 0 (0%)                                                                    | (0, 7%)   | -            | -        |

\* Heart rate increased by ≥30bpm (age 18+) or ≥40 bpm (age <18) sustained over two consecutive time points

† Fall in systolic blood pressure ≥20mmHg or diastolic blood pressure ≥10mmHg within first four minutes

‡ Symptoms of dysautonomia included dizziness, palpitations, chest pain or tremors, fatigue, muscle or joint pain, cognitive dysfunction, headache, visual disturbances, breathlessness, tingling or numbness in the skin, sweating or clamminess.

§ History of Long COVID symptoms suggestive of orthostatic intolerance prior to the lean test was taken as dizziness, palpitations, chest pain or tremors
